# Supplementary material for: Periodic Leg Movements during Sleep Associated with REM Sleep Behavior Disorder: A Machine Learning Study
Source: MDPI journal article supplement (doi:10.3390/diagnostics14040363), 2024-02-07
Supplement: s1 [file s1]

# Supplementary Material

**Table S1.** Hyperparameters tuning of Random Forest and eXtreme Gradient Boosting models

| Model   | Hyperparameters        | definition                                                       |
|---------|------------------------|------------------------------------------------------------------|
| SVM     | C = 0.7368             | Cost parameter                                                   |
| RF      | Mtry = 1               | Number of variables randomly sampled as candidates at each split |
| XGBoost | Nrounds = 400          | Maximum number of iterations/trees to grow                       |
|         | Max.depth = 3          | Depth of the tree                                                |
|         | Eta = 0.1              | Learning rate                                                    |
|         | Gamma = 0.9            | Regularisation (preventing overfitting)                          |
|         | Col.sample_by_tree=0.4 | Controls the number of features supplied to a tree               |
| XGBoost | Child_weight = 2       | Leaf threshold for stopping tree splitting                       |
|         | Subsample = 0.5        | Controls the number of samples supplied to a tree                |

SVM: Support Vector Machine; RF: Random Forest; XGBoost: eXtreme Gradient Boosting.
